# Supplementary material for: A Fat4-Dchs1 signal between stromal and cap mesenchyme cells influences nephrogenesis and ureteric bud branching
Source: Oxford University Press journal article supplement (doi:10.1242/dev.122630), 2015-01-01
Supplement: dev122630supp.pdf [file dev122630supp.pdf]

## Supplemental Material For Mao et al, A Fat4-Dchs1 signal between stromal and cap mesenchyme cells influences nephrogenesis and ureteric bud branching

### Supplementary Methods

Primer sequences:

GapdhF AGGTCGGTGTGAACGGATTTG

GapdhR TGTAGACCATGTAGTTGAGGTCA

six2F: CACCTCCACAAGAATGAAAGCG

six2R: CTCCGCCTCGATGTAGTGC

wnt7bF: TTTGGCGTCCTCTACGTGAAG

wnt7bR: CCCCgATCACAATGATGGCA

retF: GCATGTCAGACCCGAAGTGG

retR: CGCTGAGGGTGAAACCATCC

sox9F: GAGCCGGATCTGAAGAAgGA

sox9R: GCTTGACGTGTGGCTTGTTTC

E-CadF: CAGGTCTCCTCATGGCTTTGC

E-cadR: CTTCCGAAAAGAAGGCTGTCC

Ecm1F: GGGACCGTATCCAGAGCAG

Ecm1R: GCTGGTCTGAAGCCTTGAAG

DcnF: TCTTGGGCTGGACCATTTGAA

DcnR: CATCGGTAGGGGCACATAGA

Primers sequences were designed using

<http://pga.mgh.harvard.edu/primerbank/>.

## Supplementary Figures

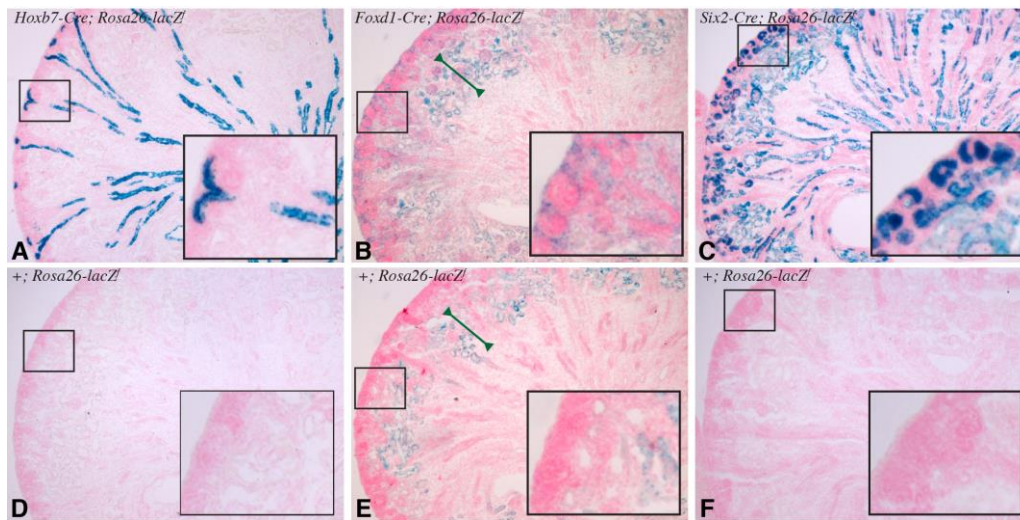

**Figure S1. Confirmation of tissue-specific Cre activity**

Sections of Newborn (P0) mouse kidneys subject to histochemical staining for  $\beta$ -galactosidase activity expressed from a conditional Rosa26-lacZ allele. A) Hoxb7-Cre B) Foxd1-Cre C) Six2-Cre. D-F) show sibling controls that lack Cre-expressing alleles. Insets show higher magnification of the boxed region encompassing uterine distal tip and nephrogenic precursors. Sections were counterstained with nuclear Fast Red.

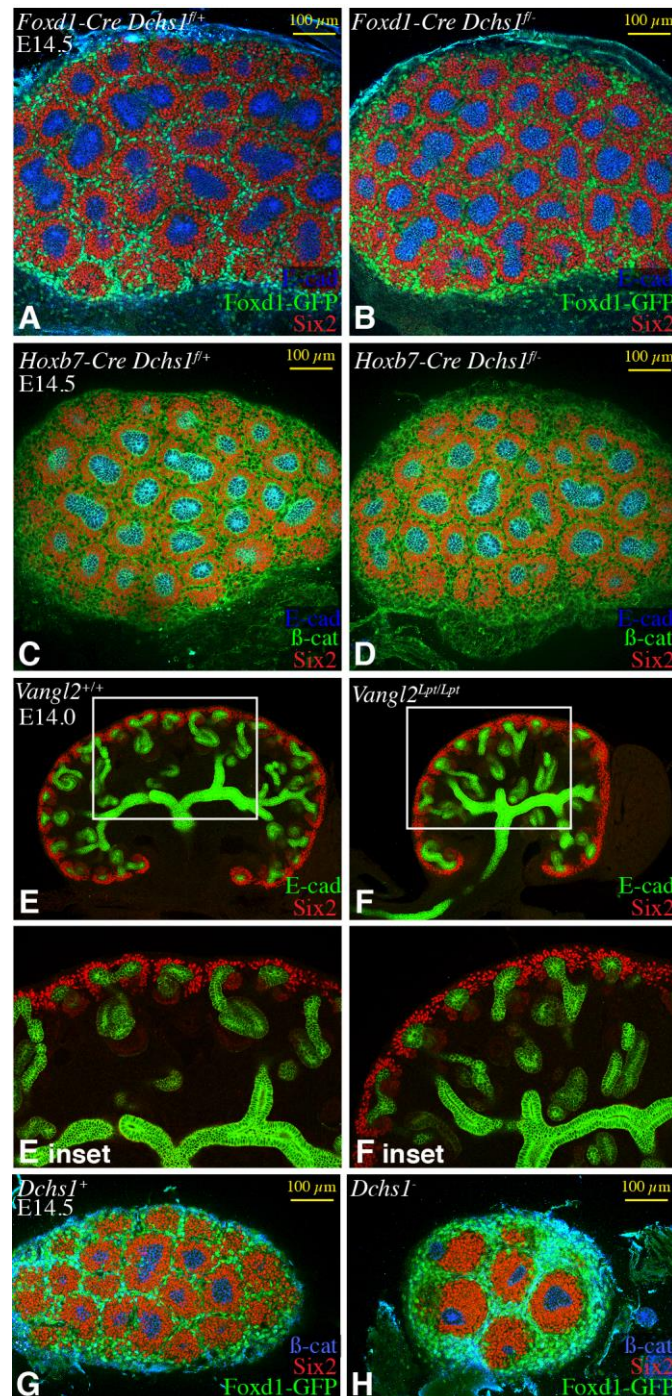

**Figure S2. Lack of requirement for Dchs1 in stroma or UB**

Embryonic kidneys stained for Six2 (red) to reveal CM, together with E-cad (blue, expressed in UB), and either  $\beta$ -cat (green, expressed in all cells) or GFP (green). Scale bar (yellow) is 100  $\mu$ m. A,B) Surface sections of E14.5 kidney from sibling control (A, Foxd1-Cre Dchs1<sup>f/+</sup>), or mouse with conditional deletion of Dchs1 in stroma (B, Foxd1-

Cre *Dchs1*<sup>f/-</sup>). C,D) Surface sections of E14.5 kidney from sibling control (C, *Hoxb7*-Cre *Dchs1*<sup>f/+</sup>), or mouse with conditional deletion of *Dchs1* in UB (D, *Hoxb7*-Cre *Dchs1*<sup>f/-</sup>). E,F) E14.0 *Vangl2*<sup>Lpt</sup> (F) and wild-type sibling (E), stained for E-cad (green) and Six2 (red). Lower panels (-inset) show higher magnifications of the boxed regions. (G,H) Surface section through sibling control (G) and *Dchs1*<sup>-/-</sup> (H) E14.5 kidneys imaged for  $\beta$ -cat (blue), Six2 (red), and Foxd1-GFP (green).



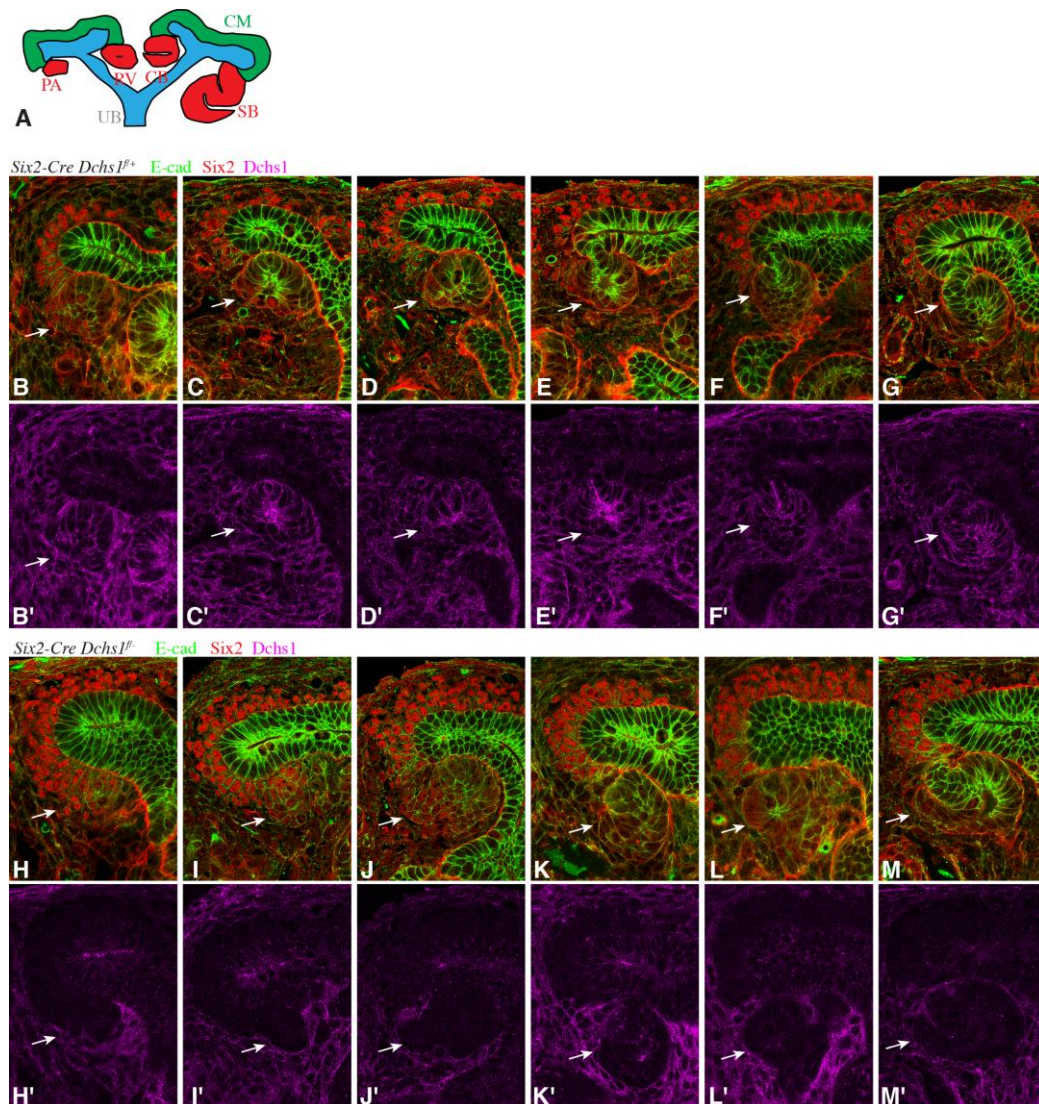

**Figure S3. Abnormal initiation of nephrogenesis after conditional deletion of Dchs1 in CM**

A) Schematic illustrating progressive stages of early nephrogenesis, from PA (pre-cellular aggregate) to RV (renal vesicle) to CB (comma shaped body) to SB (S shaped body). B-M) Examples from sibling controls (B-G, *Six2-Cre Dchs1<sup>f/f+</sup>*) or kidneys with conditional deletion of *Dchs1* in CM (H-M, *Six2-Cre Dchs1<sup>f/-</sup>*), stained for E-cad (green), *Six2* (red), and *Dchs1* (magenta, in panels marked by prime symbols). Several examples

are shown because the defects are heterogeneous. White arrows indicate the forming PA/RV/CB. Defects visible here include persistence of strong nuclear Six2 expression on the proximal side of the UB (H,I), irregular size and shape of the RV/CB (J-M, cf C-G), and irregular location and orientation of connecting tubules (L,M, cf E-G), see also Fig. 4. Dchs1 staining in A-G reveals distinct apical accumulation of Dchs1 in RV. Lack of Dchs1 staining in H-M identifies CM derivatives even after Six2 expression declines.

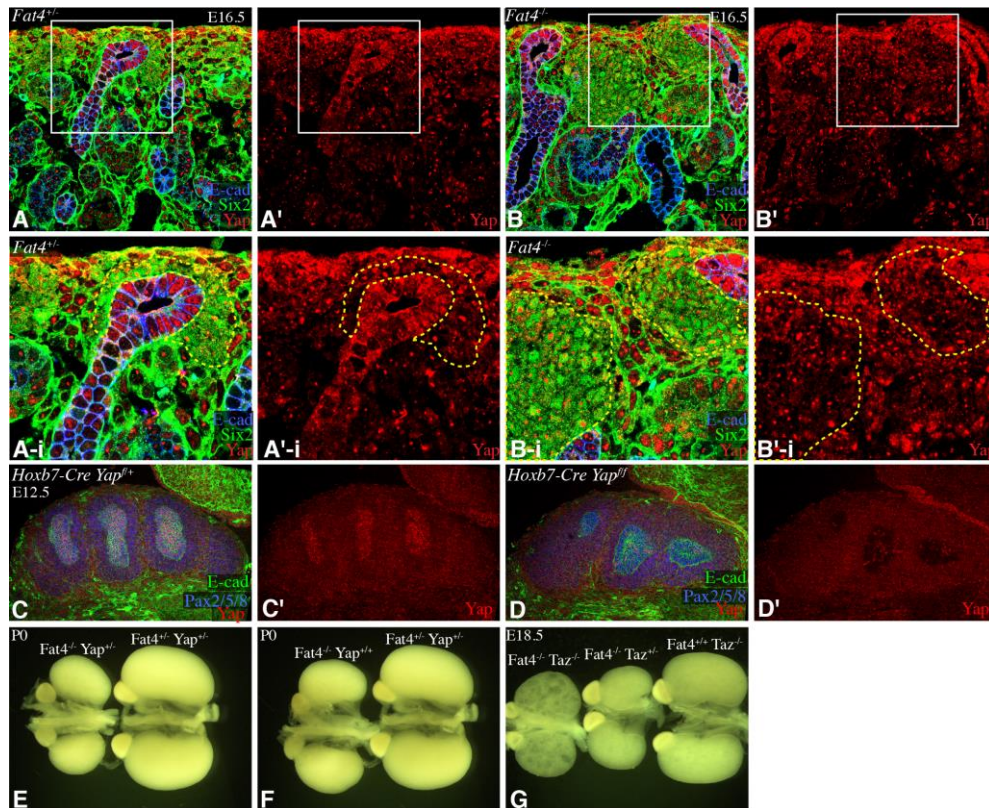

**Figure S4. Lack of interaction of *Fat4* mutation with Yap or Taz**

A,B) Confocal images of E16.5 kidneys stained for Yap using tyrimide signal amplification (red), Six2 (green), E-cad (blue). The Six2 antisera used here has high non-specific background, but Six2-specific staining is nuclear. The boxed regions are shown at high magnification below (panels labeled by "i"). Prime symbols identify panels with only a subset of stains shown. Dashed yellow line outlines CM, which shows similar levels of heterogeneous Yap nuclear stain in wild-type and mutants. C,D) Whole E12.5 kidneys stained for Yap (red) Pax2/5/8 (blue) and E-cad (green) for confirmation of Yap antisera specificity, from sibling control (C, *Hoxb7-Cre Yap<sup>f/+</sup>*), or mouse with conditional deletion of Yap in UB (D, *Hoxb7-Cre Yap<sup>f/f</sup>*). E-G) Whole kidneys from mice with combinations of *Fat4*, *Yap*, and *Taz* alleles. E) Comparison of P0 kidneys from *Fat4*<sup>-/-</sup> *Yap*<sup>+/-</sup> and *Fat4*<sup>+/-</sup> *Yap*<sup>+/-</sup> siblings. F) Comparison of P0 kidneys from *Fat4*<sup>-/-</sup> *Yap*<sup>+/+</sup> and *Fat4*<sup>-/-</sup> *Yap*<sup>+/-</sup> siblings. G) Comparison of E18.5 kidneys from *Fat4*<sup>-/-</sup> *Taz*<sup>-/-</sup>, *Fat4*<sup>-/-</sup> *Taz*<sup>+/-</sup>, *Fat4*<sup>+/-</sup> *Taz*<sup>-/-</sup> siblings.
